# Supplementary material for: Interspecific introgression mediates adaptation to whole genome duplication
Source: bioRxiv or medRxiv preprint supplement (doi:10.1101/636019), 2019-05-13
Supplement: Supplementary file [file media-1.pdf]

## Supplementary Figures and Tables

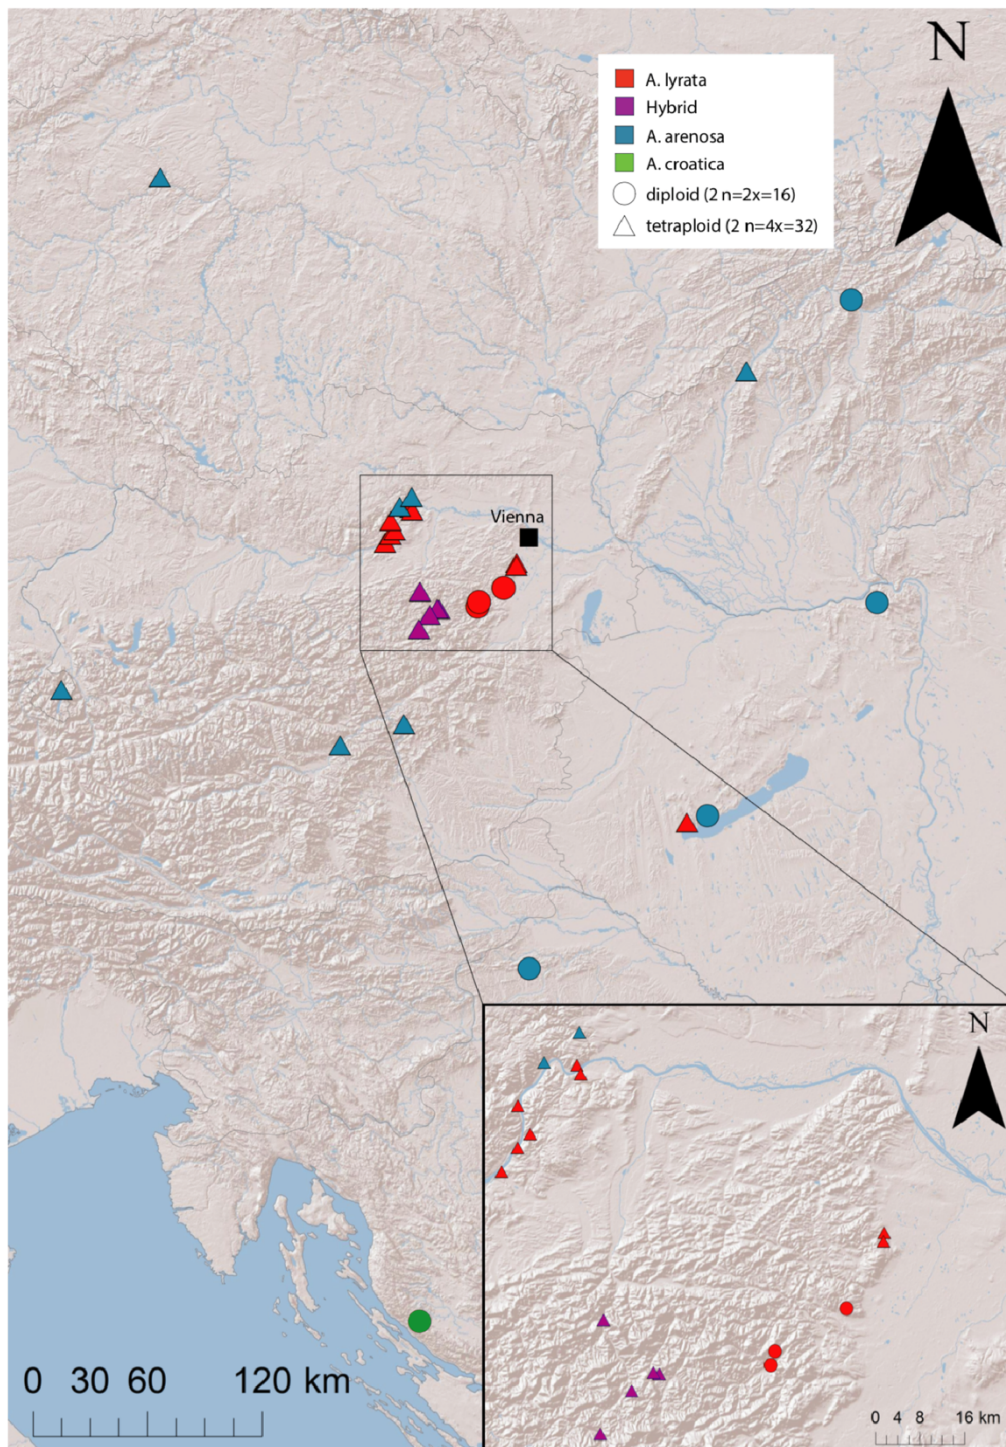

**Figure S1.** Map of Central Europe showing the locations for populations sampled in this study and from <sup>21</sup>. Circles represent diploid populations, triangles represent tetraploid populations. Colours are indicative of species and hybrids as indicated in the inset. The inset represents a zoomed in view of the eastern Austrian Forealps and the Wachau valley.

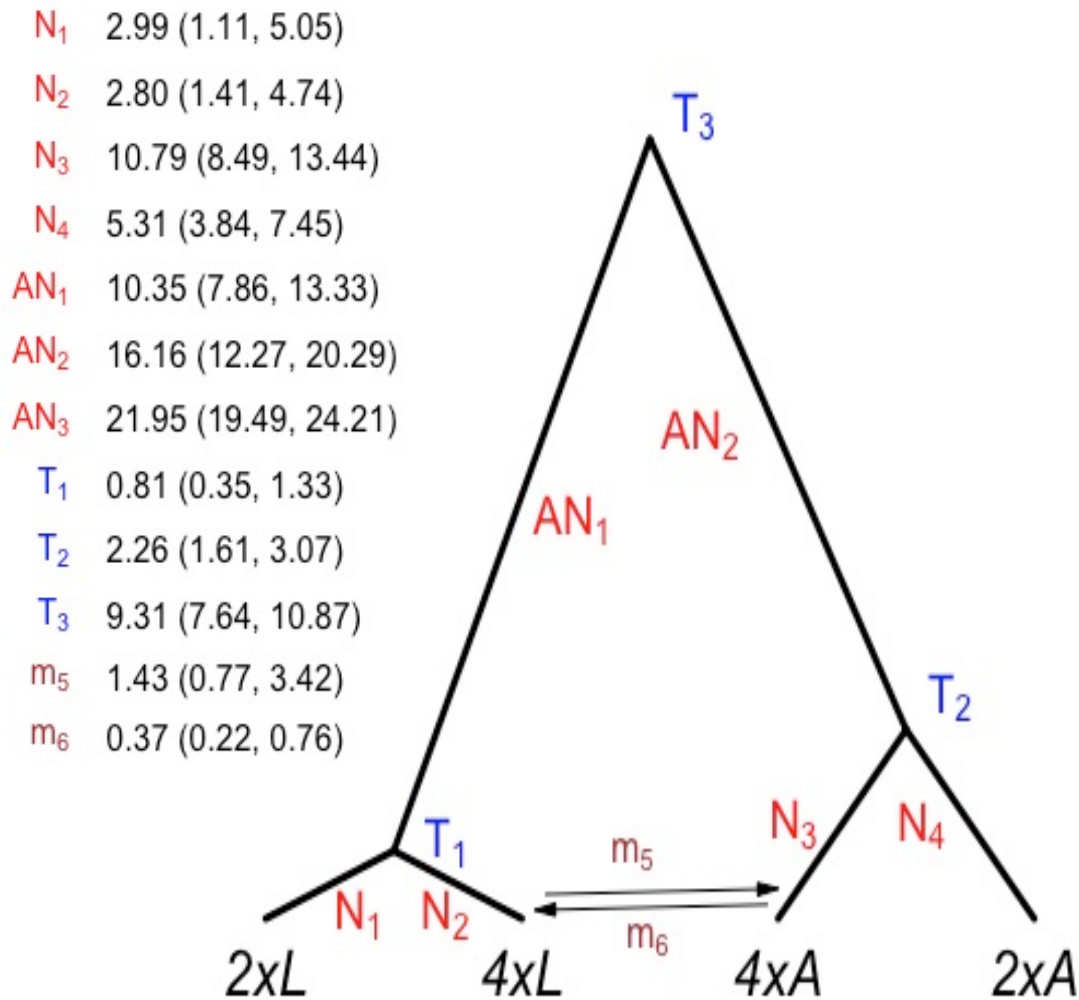

**Figure S2. Demographic parameter estimates for diploid *A. lyrata* (2xL), tetraploid *A. lyrata* (4xL), tetraploid *A. arenosa* (4xA), and diploid *A. arenosa* (2xA).** Units are 100,000's of individuals for population size (N and AN), 100,000's of generations for time estimates (T), and  $10^{-6}$  alleles per generation. Median values across replicates are given.

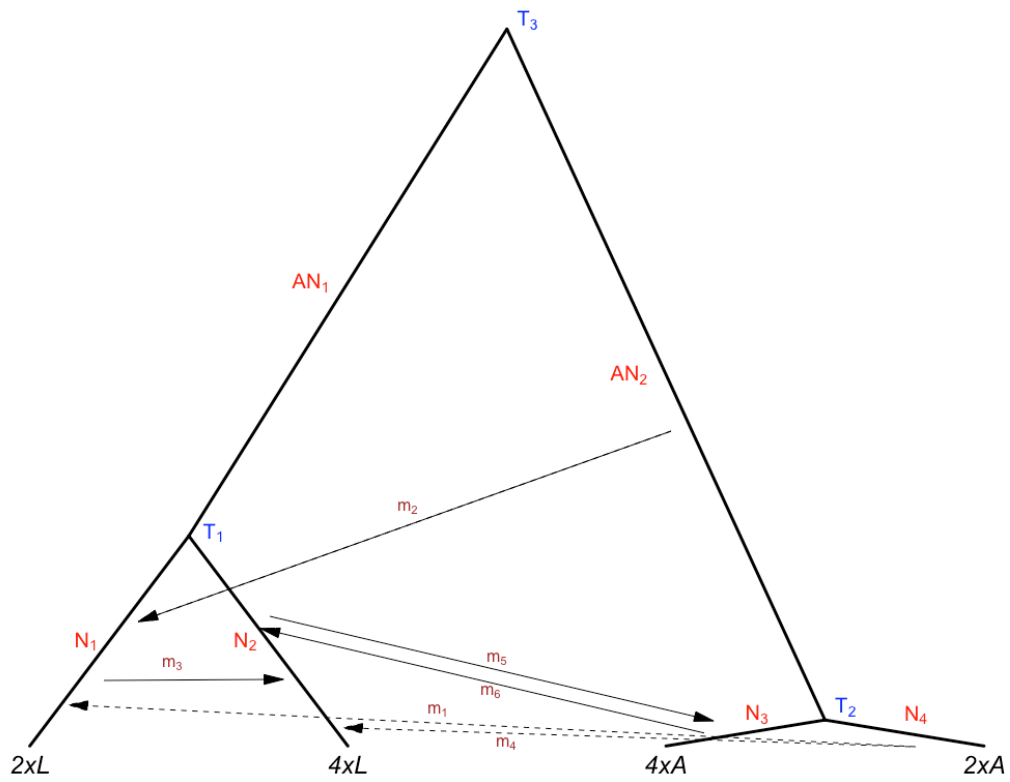

**Figure S3. Parameter estimates for the different 4 population scenarios.** Parameter values are given in Table S2.

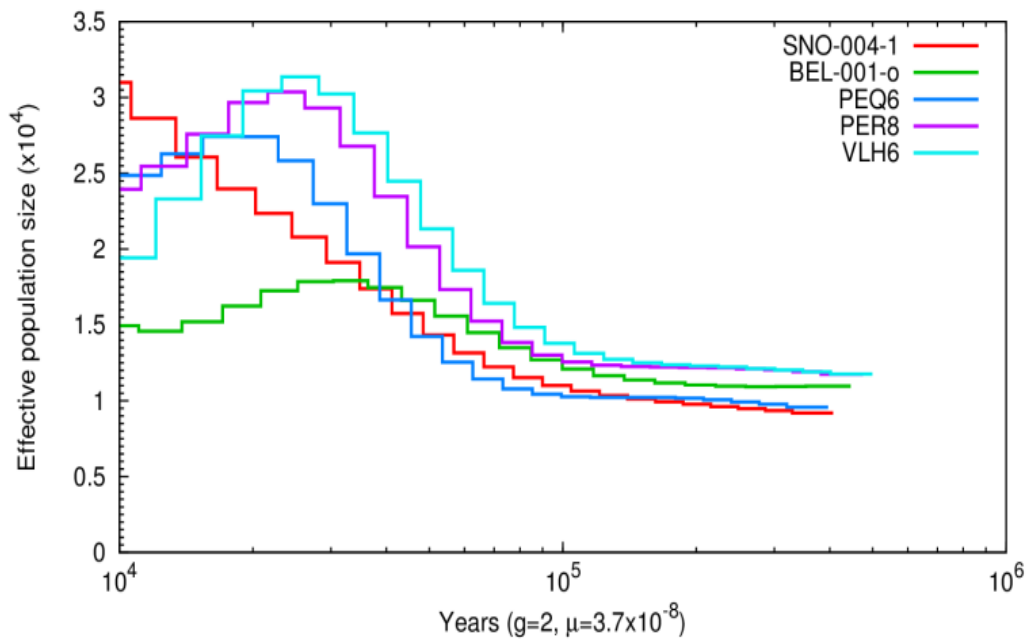

**Figure S4. Pairwise Sequentially Markovian Coalescent Model (PSMC) analysis of diploid *A. lyrata* and *A. arenosa* populations used in this study.** We used the mutation rate  $\mu=3.7 \times 10^{-8}$  and a generation time of two years for both species, as *A. arenosa* is mainly biennial, and we suppose that *A. lyrata* generates the highest number of propagules in its second year after germination.

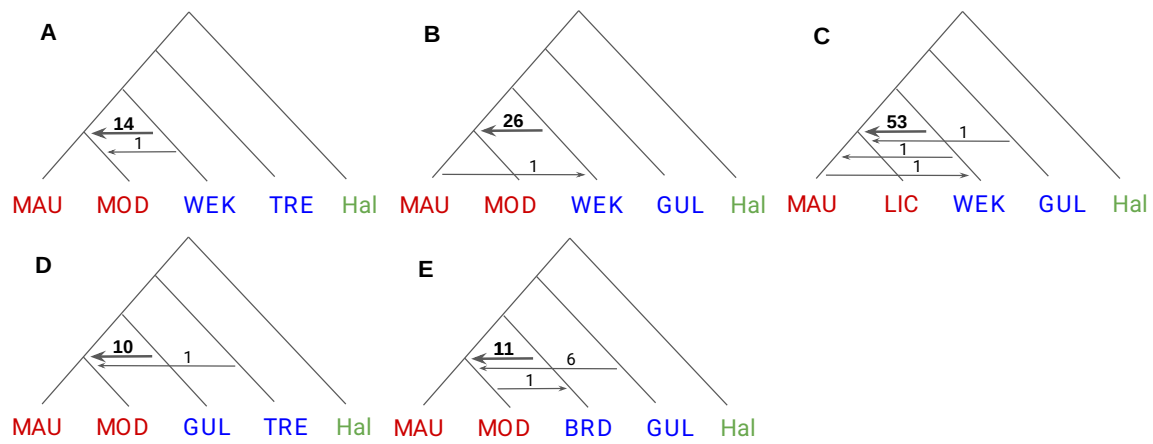

**Figure S5. Direction and frequency of introgression between pairs of autotetraploid *A. lyrata* and *A. arenosa* populations using  $D_{\text{FOIL}}$  analysis.** Red: *A. lyrata*; blue: *A. arenosa*; green: *A. halleri*. Arrows show the direction of introgression. Numbers above the arrows indicate the number of introgression-indicative genomic windows.

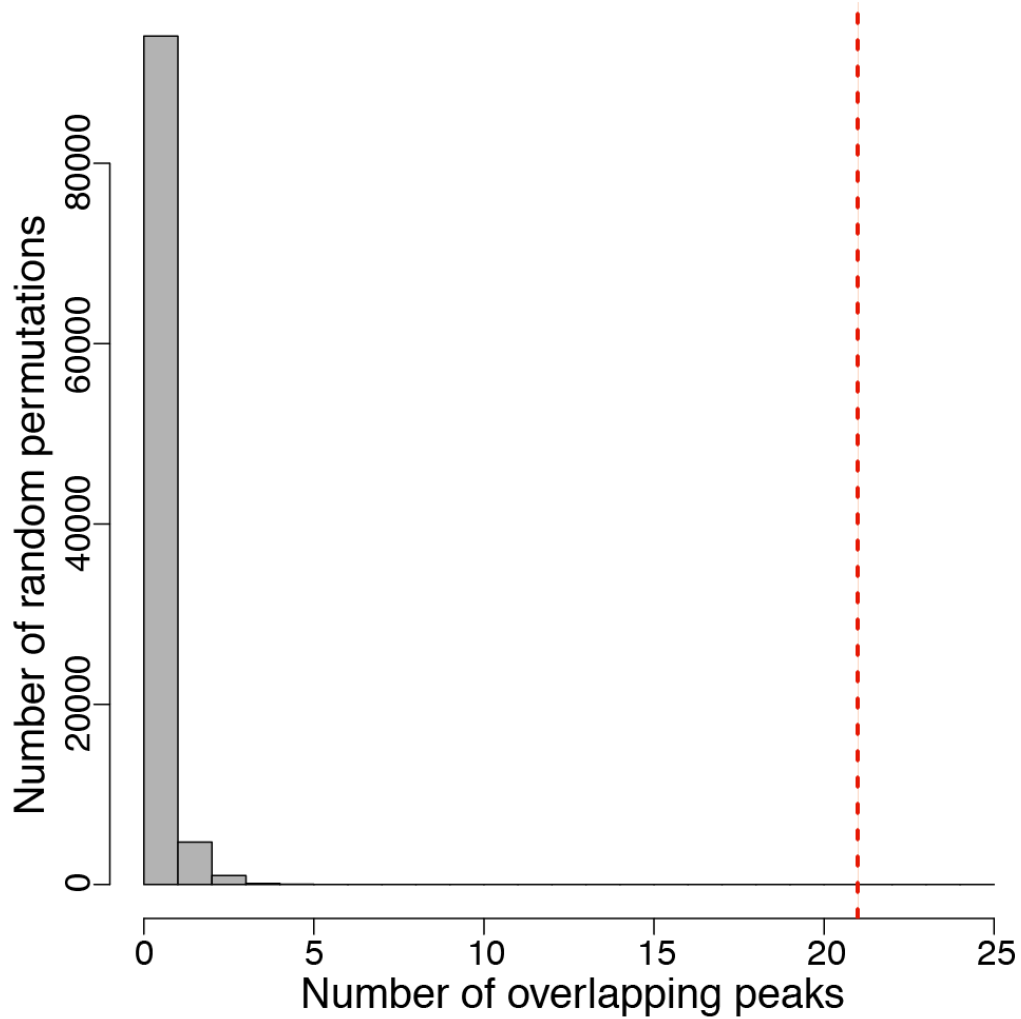

**Figure S6. Permutation tests indicating expected distribution of degree of overlap observed between *Twisst* outlier windows (61) and divergence scan outlier windows (195).** Red line indicates the observed value of 21 overlapping gene coding loci exhibiting both *Twisst* outlier and divergence scan outlier status, many more than expected by chance.

| Pop. | N ind. | Ploidy | Altitude | Latitude | Longitude | Country | Locality                                                                  | Published in (orig. code)   | Origin of tissue |
|------|--------|--------|----------|----------|-----------|---------|---------------------------------------------------------------------------|-----------------------------|------------------|
| BEL  | 3      | 2x     | 550      | 46.16167 | 16.11500  | HR      | Castle ruin Belecgrad; open sites in the forest, walls of the castle ruin | Monnahan et al. 2019 (BEL)  | wild             |
| BGS  | 3      | 4x     | 570      | 47.62806 | 13.00167  | D       | Berchtesgaden; railway, secondary gravel                                  | Hollister et al. 2012 (BGS) | cultiv.          |
| BRD  | 2      | 4x     | 350      | 50.04967 | 13.89081  | CZ      | Brdatka; open forest in canyon of Berounka river                          | Monnahan et al. 2019 (BRD)  | wild             |
| CRO  | 4      | 2x     | 1076     | 44.53147 | 15.19402  | HR      | Ljubičko Brdo and Zavižan; rocks                                          | Monnahan et al. 2019 (CRO)  | wild             |
| FRE  | 2      | 4x     | 391      | 47.99405 | 15.57118  | AT      | Freiland; rocks                                                           |                             | cultiv.          |
| GUL  | 3      | 4x     | 820      | 47.29000 | 14.93167  | AT      | Gulsen; serpentine rocks                                                  | Arnold et al. 2016 (GU)     | cultiv.          |
| GYE  | 3      | 4x     | 202      | 46.78442 | 17.28775  | HU      | Gyenesdiás; dolomitic rock on northern border of the village              |                             | wild             |
| HAL  | 3      | 4x     | 665      | 47.90187 | 15.69233  | AT      | Halbach valley; gravel                                                    |                             | wild             |
| HOC  | 3      | 4x     | 580      | 47.37000 | 15.38667  | AT      | Hochlantsch                                                               | Arnold et al. 2016 (HO)     | cultiv.          |
| KAG  | 3      | 4x     | 257      | 48.29432 | 15.42614  | AT      | Wachau, Kartause Aggsbach; rocks                                          |                             | cultiv.          |
| KEH  | 2      | 4x     | 699      | 47.81611 | 15.54311  | AT      | Kernhof; rocks, gravel                                                    |                             | cultiv.          |
| KZL  | 3      | 2x     | 330      | 47.72444 | 18.77917  | HU      | Keszölc                                                                   | Monnahan et al. 2019 (KZL)  | cultiv.          |
| LIC  | 3      | 4x     | 298      | 48.09283 | 16.27073  | AT      | Liechtenstein castle; walls of the castle ruin, rocks                     |                             | wild             |
| LOI  | 3      | 4x     | 289      | 48.39649 | 15.55268  | AT      | Wachau, Loibenberg; oak-pine forest, rocks                                |                             | cultiv.          |
| MAU  | 3      | 4x     | 244      | 48.3818  | 15.56031  | AT      | Wachau, Mauternbach; oak-pine forest, rocks                               |                             | cultiv.          |
| MOD  | 3      | 4x     | 335      | 48.07955 | 16.26718  | AT      | Castle ruin Mödling; walls of the castle ruin, rocks                      |                             | wild             |
| OCH  | 2      | 4x     | 698      | 47.87950 | 15.62691  | AT      | Untermittlerbach, road to Ochsattel; gravel                               |                             | cultiv.          |
| PEQ  | 2      | 2x     | 461      | 47.90154 | 15.96864  | AT      | Pernitz, small quarry in Haltergraben; rocks                              |                             | cultiv.          |
| PER  | 2      | 2x     | 564      | 47.92251 | 15.98176  | AT      | Pernitz, road from Pernitz to Pottenstein; rocks                          |                             | cultiv.          |
| PIL  | 3      | 4x     | 224      | 48.23901 | 15.34931  | AT      | Wachau, mouth of Pielach river into Danube river; rocks                   |                             | cultiv.          |
| ROK  | 2      | 4x     | 662      | 47.90531 | 15.68304  | AT      | Rosbachklamm; rocks, gravel                                               |                             | cultiv.          |
| SCB  | 2      | 4x     | 244      | 48.27428 | 15.39301  | AT      | Wachau, Schönbüchel; rocks                                                |                             | cultiv.          |
| SEN  | 1      | 4x     | 296      | 48.44750 | 15.56469  | AT      | Castle ruin Senftenberg; walls of the castle ruin, rocks                  |                             | cultiv.          |
| SNO  | 2      | 2x     | 390      | 49.17417 | 18.86167  | SK      | Strečno                                                                   | Yant et al. 2012 (SN)       | cultiv.          |
| SWA  | 2      | 4x     | 264      | 48.34031 | 15.40085  | AT      | Wachau, Schwallenbach; rocks                                              |                             | cultiv.          |
| SZI  | 3      | 2x     | 130      | 46.80667 | 17.43444  | HU      | Szigligeti vár                                                            | Monnahan et al. 2019 (SZI)  | cultiv.          |
| TBG  |        | 4x     | 640      | 48.13972 | 8.23667   | D       | Triberg; railway, secondary gravel                                        | Hollister et al. 2012 (TBG) | cultiv.          |
| TRE  | 3      | 4x     | 280      | 48.89417 | 18.04472  | SK      | Trenčín; rocks at the castle ruin                                         | Monnahan et al. 2019 (TRE)  | cultiv.          |
| VLH  | 3      | 2x     | 484      | 47.97978 | 16.16374  | AT      | Vöslauer Hütte; pine forest, rocks                                        |                             | cultiv.          |
| WEK  | 3      | 4x     | 359      | 48.40502 | 15.47291  | AT      | Wachau, Weißenkirchen; oak-pine forest, former vineyard                   | Monnahan et al. 2019 (WEK)  | wild             |

**Table S1. The 30 populations included in this study.**

| Variable   | Model1   | Model2   | Model3   | Model4   | Model5   | Model6   |
|------------|----------|----------|----------|----------|----------|----------|
| N1         | 465938   | 482982   | 437237   | 303955   | 110886   | 369141   |
| N2         | 75834    | 88151    | 188323   | 289967   | 373998   | 339673   |
| N3         | 836187   | 873906   | 927130   | 1079527  | 1120090  | 1091553  |
| N4         | 561181   | 461999   | 474882   | 540394   | 566028   | 473956   |
| AN1        | 4959828  | 4376433  | 3004479  | 1036598  | 1162941  | 934617   |
| AN2        | 2036501  | 2011382  | 1901016  | 1611485  | 1169502  | 1746457  |
| AN3        | 2574717  | 2003004  | 2072445  | 2207793  | 2354880  | 2249547  |
| T1         | 2034971  | 383815   | 253022   | 81326    | 47876    | 99582    |
| T2         | 217193   | 182807   | 190528   | 230060   | 247875   | 210015   |
| T3         | 6589497  | 1238849  | 1095980  | 930721   | 613422   | 838791   |
| m1         | 2.79E-07 | --       | --       | --       | --       | --       |
| m2         | 7.48E-07 | --       | --       | --       | --       | --       |
| m3         | 1.71E-05 | 2.44E-05 | 8.28E-06 | --       | --       | --       |
| m4         | 1.18E-06 | 1.28E-06 | --       | --       | --       | --       |
| m5         | 3.61E-07 | 5.80E-07 | 4.30E-07 | 4.29E-07 | 8.14E-07 | --       |
| m6         | 2.71E-06 | 4.34E-06 | 2.21E-06 | 1.57E-06 | --       | 1.26E-06 |
| Likelihood | -623798  | -622710  | -622579  | -622342  | -625995  | -622483  |
| AIC        | 2872730  | 2867798  | 2867139  | 2865432  | 2882840  | 2866662  |

**Table S2. Parameter estimates, likelihood, and AIC for different 4-population scenarios in *fastsimcoal2*.** Model 4 with the highest likelihood and lowest AIC was chosen. Mean values are given, in contrast to medians in Figure 1C and Figure S2.



| Population | Plant no. | No. cells with MIs scored | No. cells with stable MIs | No. cells with unstable MIs | % stable | % unstable |
|------------|-----------|---------------------------|---------------------------|-----------------------------|----------|------------|
| LIC        | 1         | 13                        | 13                        | 0                           | 100      | 0          |
|            | 2         | 14                        | 3                         | 11                          | 21       | 79         |
|            | 3         | 21                        | 4                         | 17                          | 19       | 81         |
|            | 4         | 49                        | 40                        | 9                           | 82       | 18         |
|            | 5         | 22                        | 0                         | 22                          | 0        | 100        |
|            | 6         | 13                        | 10                        | 3                           | 77       | 23         |
| MOD        | 1         | 20                        | 13                        | 7                           | 65       | 35         |
|            | 2         | 67                        | 58                        | 9                           | 87       | 13         |
|            | 3         | 8                         | 7                         | 1                           | 88       | 13         |
|            | 4         | 25                        | 1                         | 24                          | 4        | 96         |
| KAG        | 1         | 23                        | 21                        | 2                           | 91       | 9          |
|            | 2         | 35                        | 34                        | 1                           | 97       | 3          |
|            | 3         | 30                        | 0                         | 30                          | 0        | 100        |
|            | 4         | 42                        | 29                        | 13                          | 69       | 31         |
|            | 5         | 39                        | 27                        | 12                          | 69       | 31         |
| ROK        | 1         | 17                        | 0                         | 17                          | 0        | 100        |
|            | 2         | 38                        | 30                        | 8                           | 79       | 21         |
|            | 3         | 25                        | 10                        | 15                          | 40       | 60         |
|            | 4         | 37                        | 10                        | 27                          | 27       | 73         |
|            | 5         | 47                        | 13                        | 34                          | 28       | 72         |
| WEK        | 1         | 18                        | 2                         | 16                          | 11       | 89         |
|            | 2         | 30                        | 29                        | 1                           | 97       | 3          |
|            | 3         | 15                        | 13                        | 2                           | 87       | 13         |
|            | 4         | 26                        | 26                        | 0                           | 100      | 0          |
|            | 5         | 35                        | 30                        | 5                           | 86       | 14         |
| SEN        | 1         | 25                        | 0                         | 25                          | 0        | 100        |
|            | 2         | 29                        | 2                         | 27                          | 7        | 93         |
|            | 3         | 22                        | 2                         | 20                          | 9        | 91         |
|            | 4         | 29                        | 2                         | 27                          | 7        | 93         |
|            | 5         | 16                        | 3                         | 13                          | 19       | 81         |
| TBG        | 1         | 47                        | 32                        | 15                          | 68       | 32         |
|            | 2         | 29                        | 3                         | 26                          | 10       | 90         |
|            | 3         | 52                        | 37                        | 15                          | 71       | 29         |
|            | 4         | 22                        | 6                         | 16                          | 27       | 73         |
|            | 5         | 13                        | 9                         | 4                           | 69       | 31         |

**Table S3. Chromosome stability scoring of individual plants from tetraploid populations of *A. lyrata* and *A. arenosa* and a hybrid population at meiotic metaphase I (MI).** Chromosome spreads with all rod and/or ring bivalents were scored as “Stable meiosis” (Figure 1D), while multivalents with multiple chiasmata were scored as “Unstable meiosis” (Figure 1E). Tetraploid *A. lyrata*: LIC, MOD, KAG. Tetraploid *A. arenosa*: WEK, SEN, TBG. The TBG population was not integrated in the other parts of this study, but is included for comparison; it was the tetraploid *A. arenosa* population on which the study of<sup>13</sup> was based.

|                                                                                | <b>Contrast</b>           | <b>No. SNPs</b> | <b>AFD</b> | $d_{XY}$ | <b>Fst</b> | <b>Rho</b> | <b>Fixed Diff</b> |
|--------------------------------------------------------------------------------|---------------------------|-----------------|------------|----------|------------|------------|-------------------|
| <i>Lyrata</i> diploid vs. tetraploid                                           | <i>Lyd</i> vs. <i>Let</i> | 2,904,110       | 0.14       | 0.22     | 0.09       | 0.19       | 270               |
|                                                                                | <i>Lyd</i> vs. <i>Lwt</i> | 3,794,257       | 0.11       | 0.16     | 0.07       | 0.17       | 64                |
| <i>Lyrata</i> tetraploid vs. tetraploid                                        | <i>Let</i> vs. <i>Lwt</i> | 4,795,381       | 0.09       | 0.16     | 0.06       | 0.13       | 24                |
| <i>Arenosa</i> tetraploid vs. tetraploid                                       | <i>Aht</i> vs. <i>Aat</i> | 1,812,223       | 0.10       | 0.16     | 0.03       | 0.07       | 0                 |
| <i>Lyrata</i> vs. <i>arenosa</i>                                               | <i>Lyd</i> vs. <i>Aht</i> | 1,729,114       | 0.25       | 0.27     | 0.39       | 0.39       | 41,810            |
|                                                                                | <i>Lyd</i> vs. <i>Aat</i> | 2,874,610       | 0.23       | 0.24     | 0.40       | 0.40       | 57,492            |
|                                                                                | <i>Let</i> vs. <i>Aht</i> | 2,257,560       | 0.21       | 0.24     | 0.34       | 0.36       | 17,000            |
|                                                                                | <i>Lwt</i> vs. <i>Aht</i> | 2,513,764       | 0.15       | 0.19     | 0.26       | 0.32       | 767               |
|                                                                                | <i>Let</i> vs. <i>Aat</i> | 3,644,666       | 0.20       | 0.23     | 0.35       | 0.37       | 21,372            |
|                                                                                | <i>Lwt</i> vs. <i>Aat</i> | 3,653,076       | 0.16       | 0.20     | 0.29       | 0.34       | 947               |
| Hybrids from the eastern Austrian Forealps vs. <i>lyrata</i> or <i>arenosa</i> | <i>Hy1</i> vs. <i>Lyd</i> | 4,165,349       | 0.16       | 0.20     | 0.17       | 0.29       | 259               |
|                                                                                | <i>Hy2</i> vs. <i>Lyd</i> | 4,055,168       | 0.16       | 0.20     | 0.15       | 0.27       | 322               |
|                                                                                | <i>Hy1</i> vs. <i>Aat</i> | 3,797,036       | 0.11       | 0.18     | 0.11       | 0.20       | 2                 |
|                                                                                | <i>Hy2</i> vs. <i>Aat</i> | 3,752,996       | 0.13       | 0.19     | 0.15       | 0.24       | 43                |

**Table S4. Differentiation between various contrasts.** Genome-wide metrics of differentiation are allele frequency differences (AFD),  $d_{XY}$ , Fst, Rho, and the number of fixed differences (Fixed Diff). Diploid *A. lyrata*: *Lyd*. Tetraploid *A. lyrata*: *lyrata* eastern tetraploids (*Let*), *lyrata* Wachau tetraploids (*Lwt*). Tetraploid *A. arenosa*: *arenosa* Hercynian tetraploids (*Aht*), *arenosa* Alpine tetraploids (*Aat*). Hybrids from the eastern Austrian Forealps: HAL, ROK, FRE, OCH, KEH (*Hy1*), and, alternatively, HAL, ROK, FRE, OCH (*Hy2*); the distinction between *Hy1* and *Hy2* was made because only HAL, ROK, FRE, and OCH are intermediate hybrids (KEH is more *arenosa*-like).

### **Supplementary Datasets:**

**Supplementary Dataset S1:** List of the top 1% outliers from the genome scan of diploid *A. lyrata* vs. *Let* (“*Let* scan”) and diploid *A. lyrata* vs. *Lwt* (“*Lwt* scan”). The overlapping outlier loci are shown in a separate tab.

**Supplementary Dataset S2.** Genomic windows with weightings above 0.5 for topologies 6, 11 and 14 in the *Twisst* analyses. Genes-coding loci found in both *Twisst* analyses are indicated in bold.
